# Supplementary material for: Formation of assembled silver nanowires by reduction of silver thiolate in polyol/toluene medium
Source: Royal Society of Chemistry journal article supplement (doi:10.1039/b304021f), 2003-01-01
Supplement: b304021f-s0.doc [file b304021f-s0.doc]

# Supplementary data

*Experimental details* : A mixture containing 0.12 mmol of dodecanethiol dissolved in 75 ml of toluene, a variable amount of sodium acetate and acetic acid (in the range 3 - 12 mmol) dissolved in 50 ml of 1,2-propane diol, 0.24 mmol of silver nitrate dissolved in 25 ml of 1,2-propane diol, was stirred and heated to reflux (115°C) for 1 hour, and then cooled slowly to room temperature. The red orange toluene solution containing a solid phase in suspension was separated from the polyol phase in a separating funnel. The solid phase was recovered by centrifugation. Transmission electron microscopy studies were performed with a JEOL 100 kV microscope JEM-100CX II. High resolution experiments sere performed using a JEOL JEM 2010 UHR operating at 200 kV. Scanning electron microscope studies were performed on a Cambridge S-120 microscope. UV-visible spectra were performed on a Varian Cary 5E spectrophotometer. The colloidal solutions in toluene were studied by transmission and the solid phase by diffuse reflectance. Thermal analysis (TGA-TDA) were performed on a Setaram apparatus. X-ray diffraction (XRD) patterns were recorded on a Siemens D5000 diffractometer (Cu K radiation).
